# Supplementary figures and images for: Evaluation of subcutaneous implantable cardioverter-defibrillator performance in patients with ion channelopathies from the EFFORTLESS cohort and comparison with a meta-analysis of transvenous ICD outcomes
Source: PubMed Central journal article supplement — Heart Rhythm O2. 2020 Oct 28;1(5):326–35. doi: 10.1016/j.hroo.2020.10.002 (PMC8183957; doi:10.1016/j.hroo.2020.10.002), 2020-10-28

A.

### Appropriate Episodes by Channelopathy Type

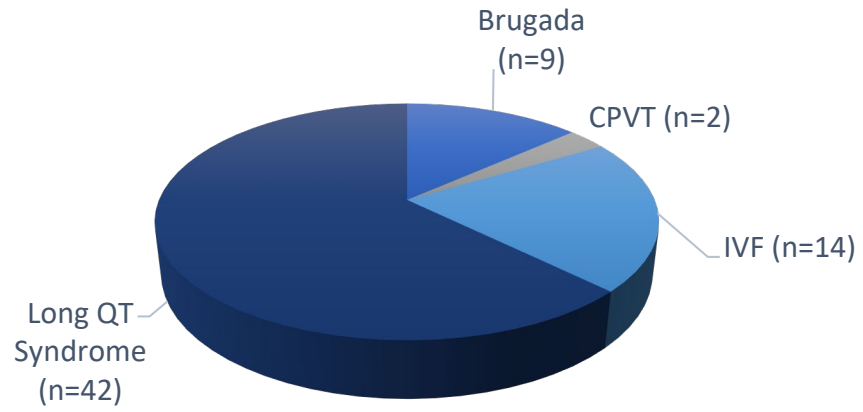

B.

### Types of Appropriate Episodes

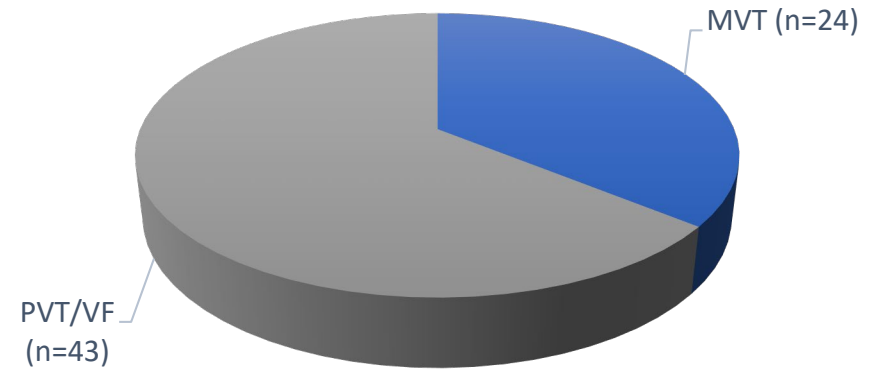

Supplement: mmc2.pdf [file mmc2.pdf]
